# Supplementary material for: Correction: Comparison of O-Antigen Gene Clusters of All O-Serogroups of Escherichia coli and Proposal for Adopting a New Nomenclature for O-Typing
Source: PubMed Central journal article supplement (PMC4847782; doi:10.1371/journal.pone.0154551), 2016-04-27

# PLOS ONE

## Comparison of O-Antigen Gene Clusters of all O-Serogroups of Escherichia coli and Proposal for adopting a new nomenclature for O-Typing of Escherichia coli.

--Manuscript Draft--

|                              |                                                                                                     |
|------------------------------|-----------------------------------------------------------------------------------------------------|
| <b>Manuscript Number:</b>    | PONE-D-16-07782                                                                                     |
| <b>Article Type:</b>         | Author Correction                                                                                   |
| <b>Corresponding Author:</b> | Chitrita DebRoy<br>The Pennsylvania State University<br>University Park, Pennsylvania UNITED STATES |
| <b>First Author:</b>         | Chitrita DebRoy                                                                                     |
| <b>Order of Authors:</b>     | Chitrita DebRoy                                                                                     |

# Correction

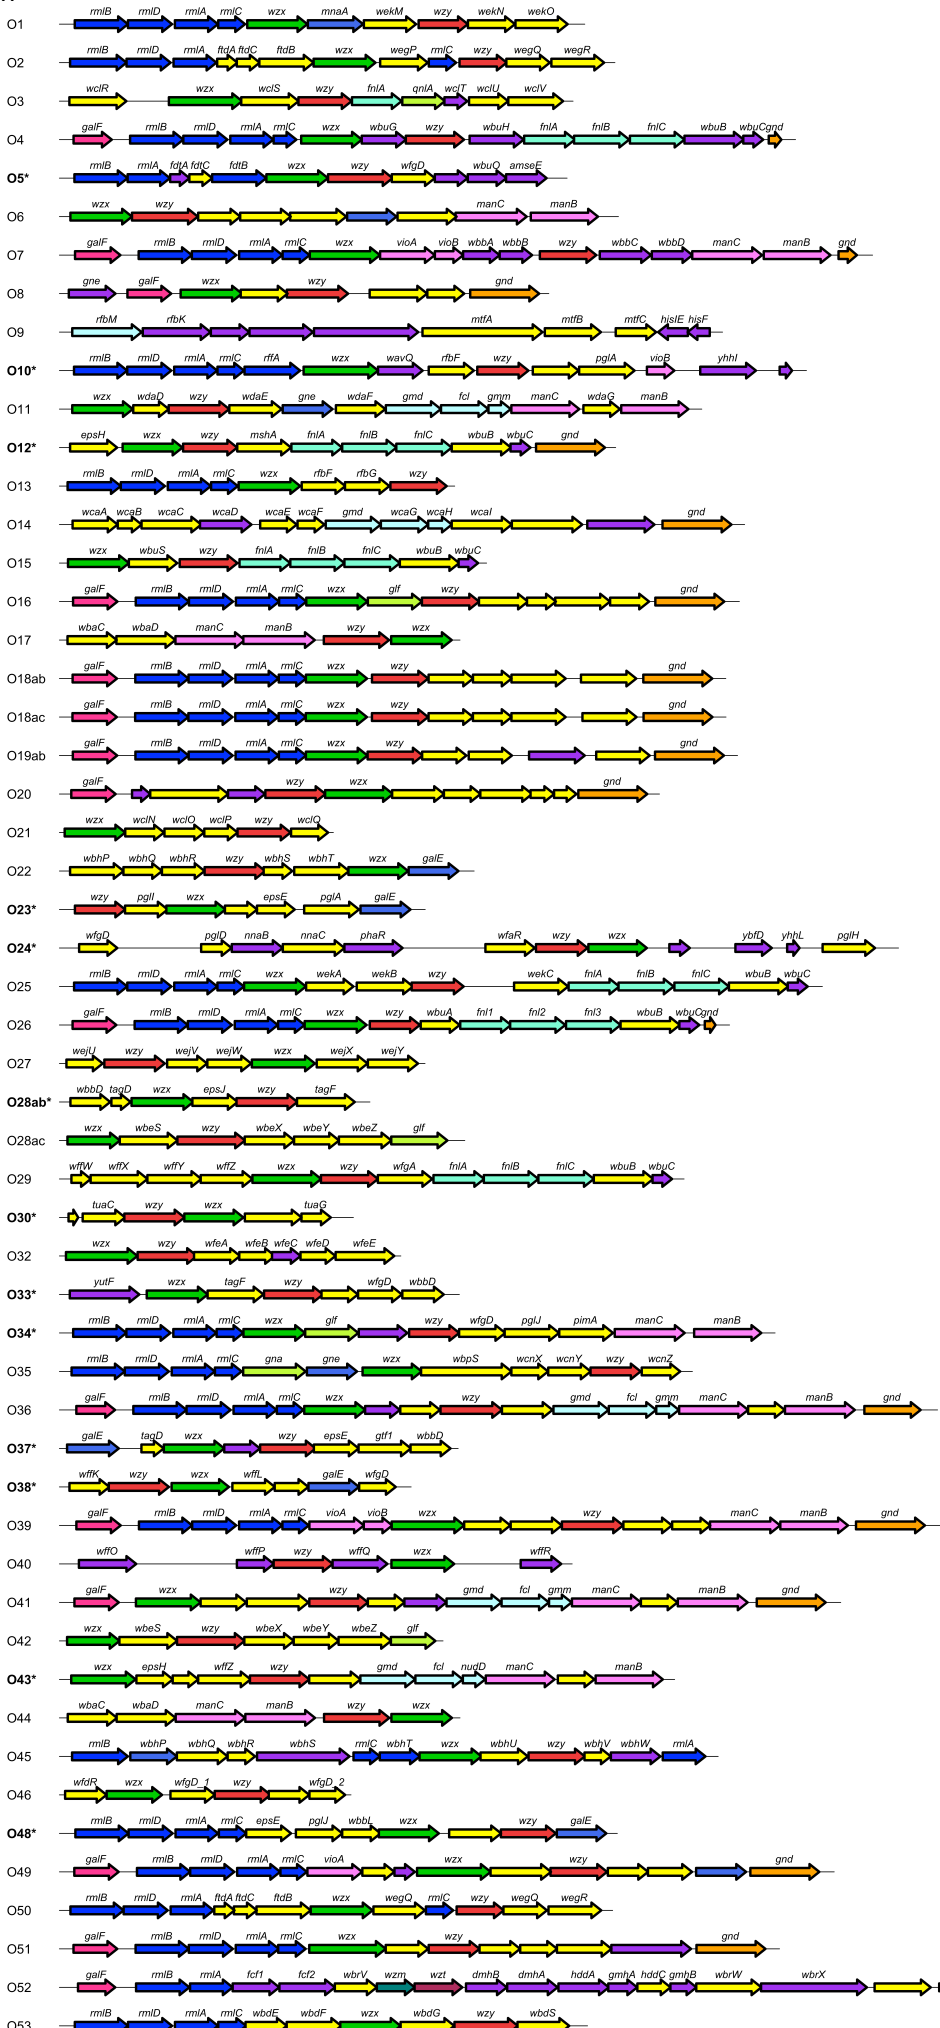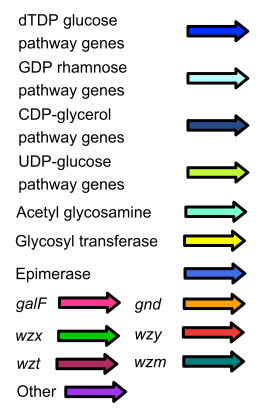

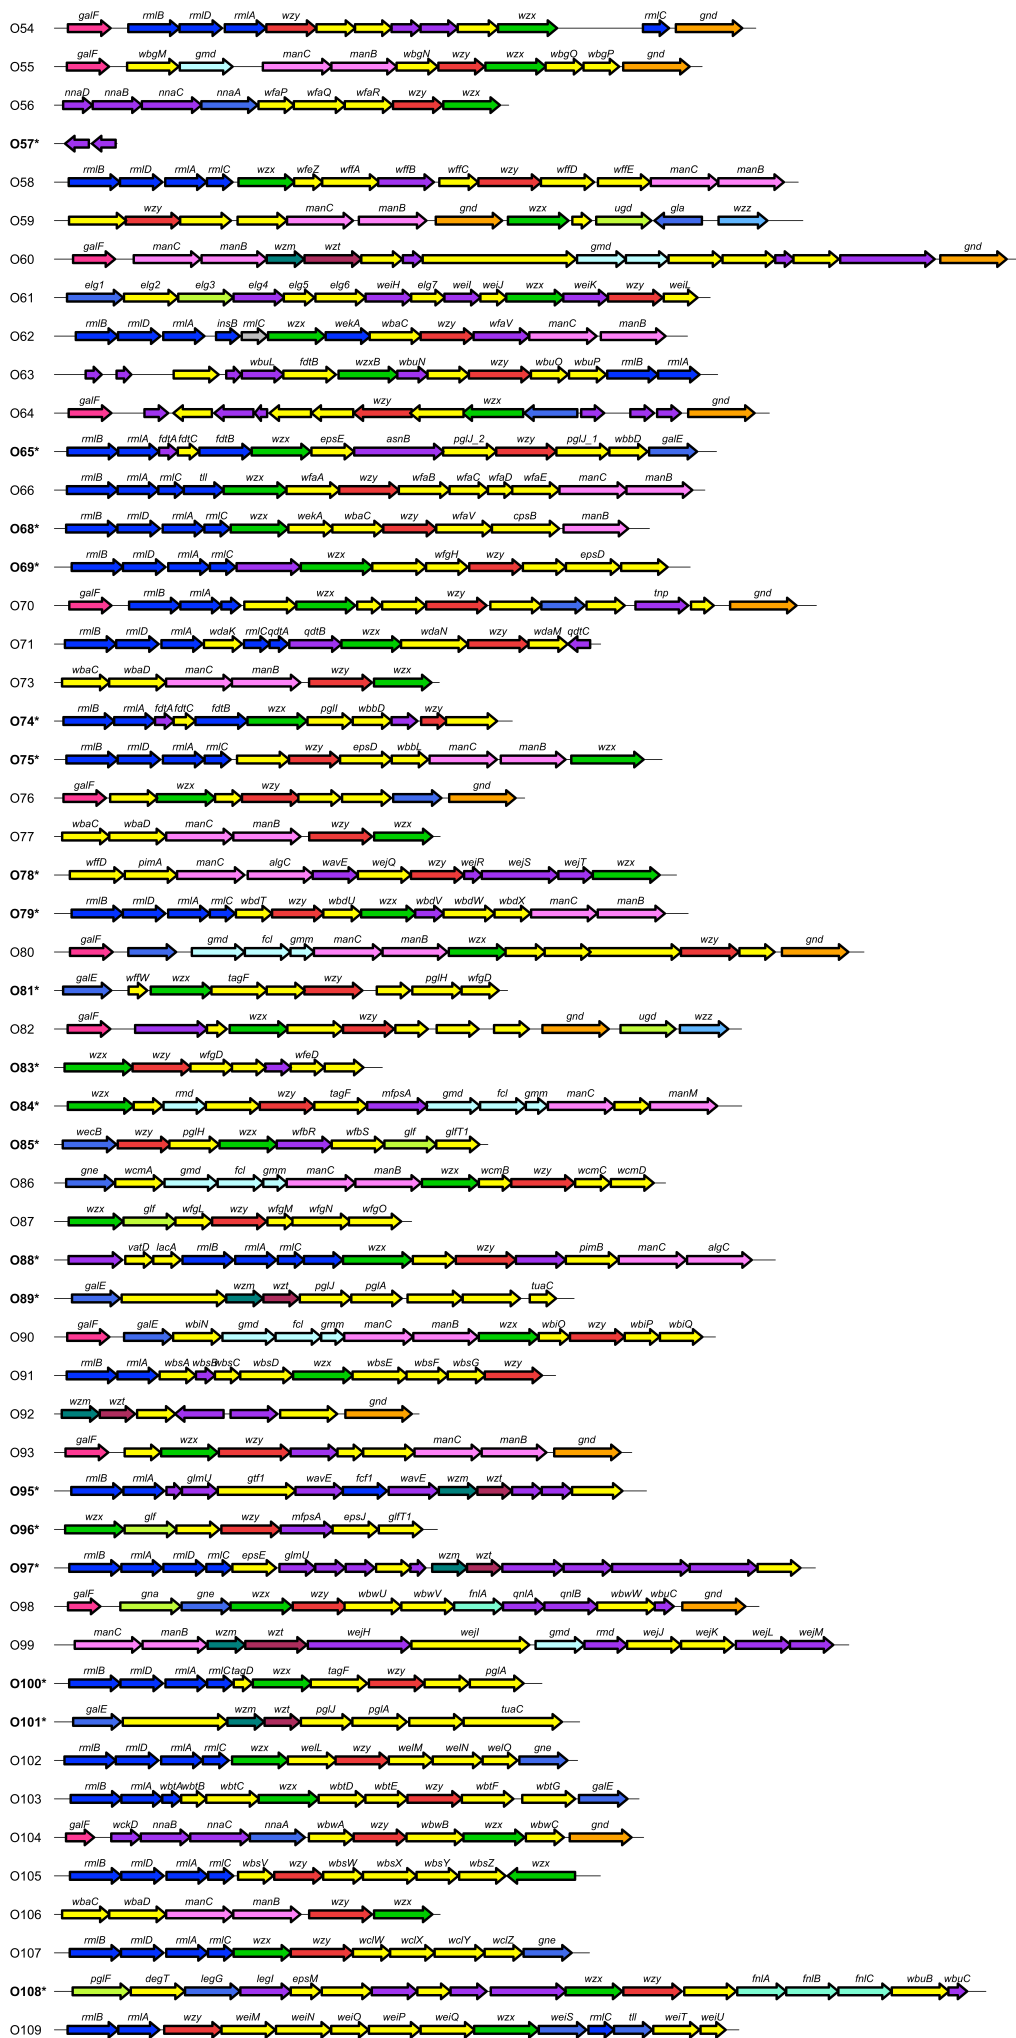

- dTDP glucose pathway genes
- GDP rhamnose pathway genes
- CDP-glycerol pathway genes
- UDP-glucose pathway genes
- Acetyl glycosamine
- Glycosyl transferase
- Epimerase
- galF* *gnd*
- wzx* *wzy*
- wzt* *wzm*
- Other

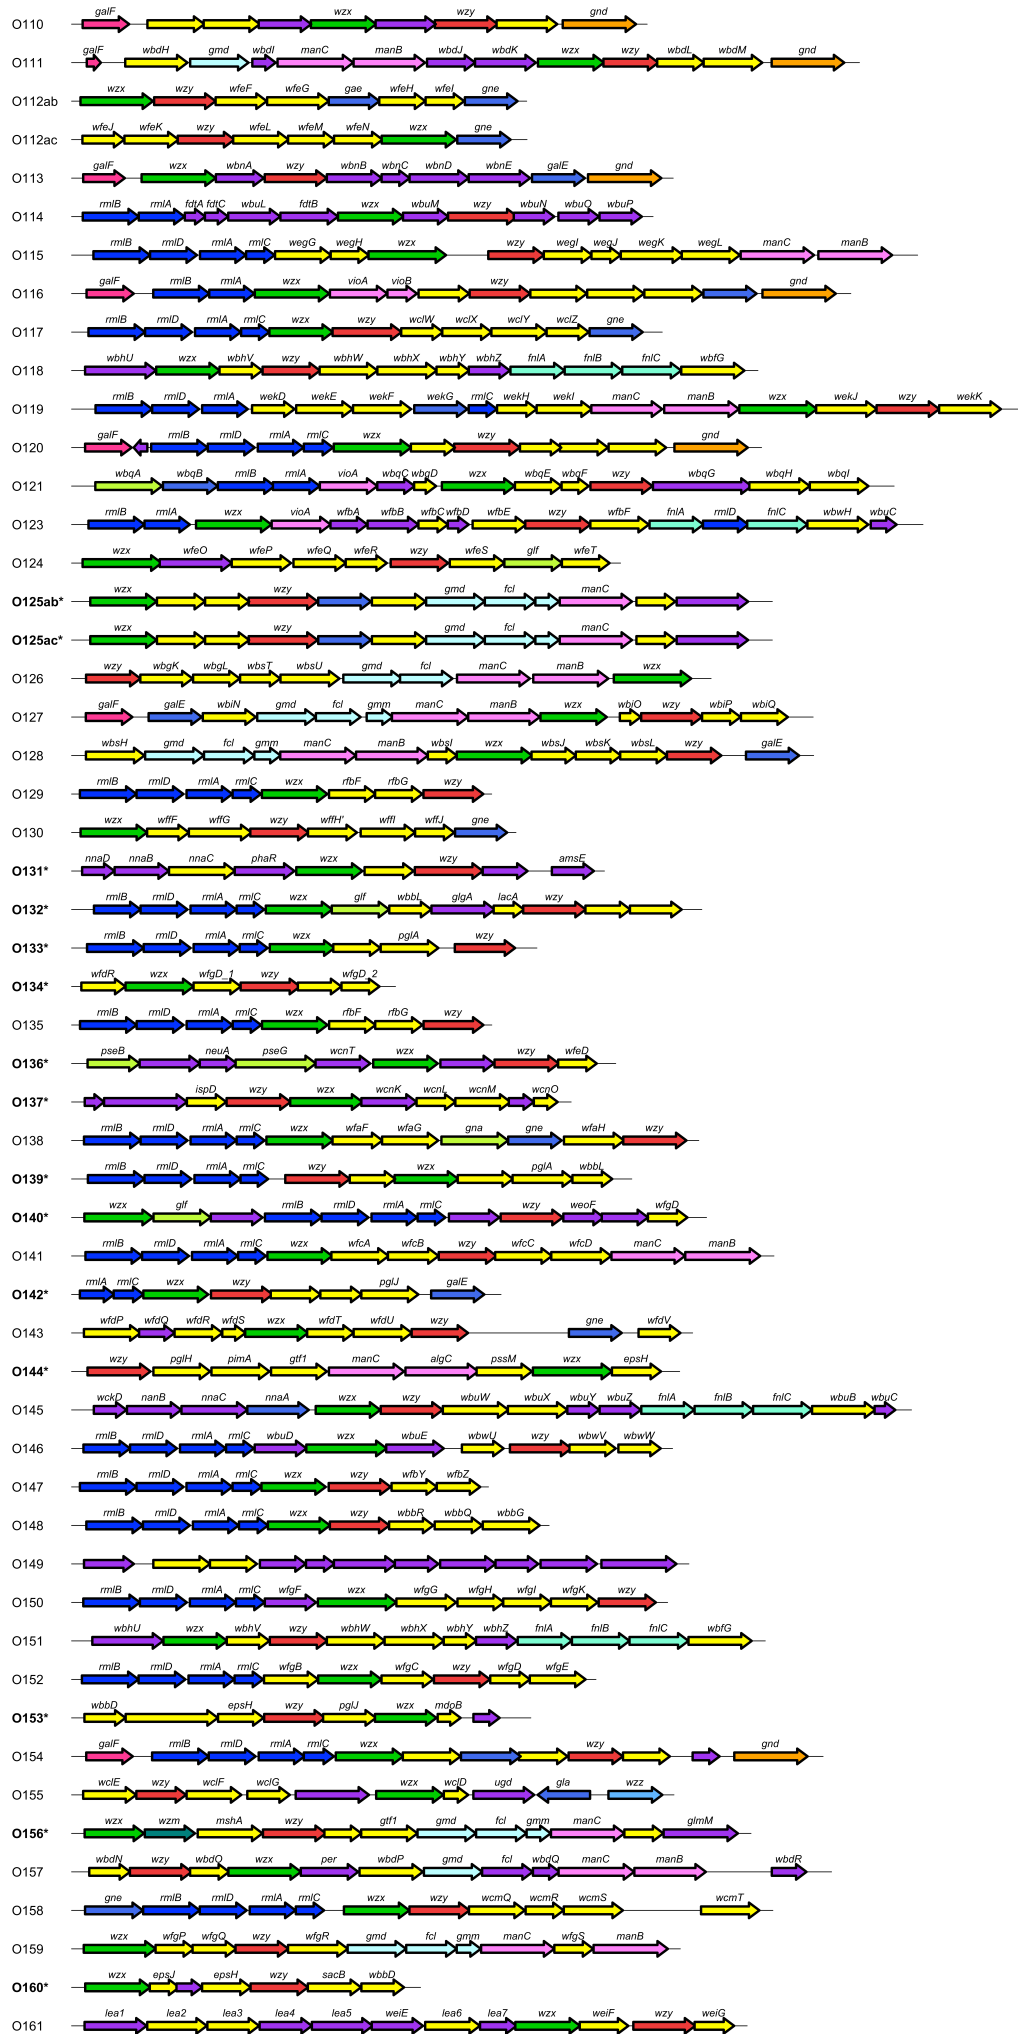

Supplement: pone.0154551.s001.pdf [file pone.0154551.s001.pdf]
